# Supplementary material
Source: publisher figshare collection journal article supplement (https://acs.figshare.com/ndownloader/files/5159311)
Supplement: Supplementary file 1 [file 5159311]

# Mitomycin Synthetic Studies: Stereocontrolled and Convergent Synthesis of a Fully Elaborated Aziridinomitosane

**Robert S. Coleman,\* François-Xavier Felpin, and Wei Chen**

Department of Chemistry, The Ohio State University, 100 West 18<sup>th</sup> Avenue  
Columbus, Ohio 43210

## Supporting Information

### Contents:

|                                                        |              |
|--------------------------------------------------------|--------------|
| <b>General Methods</b> .....                           | <b>2</b>     |
| <b>Experimental Procedures and Spectral Data</b> ..... | <b>2-22</b>  |
| <b>ORTEP Structure of 37</b> .....                     | <b>23</b>    |
| <b>Nuclear Magnetic Resonance Spectra</b> .....        | <b>24-72</b> |

**General Methods:** Proton and carbon NMR spectra were recorded on 400 and 500 MHz spectrometers. Chemical shifts are reported in ppm relative to the chloroform peak at 7.24 ppm ( $^1\text{H}$ ) or 77.0 ppm ( $^{13}\text{C}$ ), or the acetone peak at 2.04 ppm ( $^1\text{H}$ ) or 29.8 and 206.0 ppm ( $^{13}\text{C}$ ). Assignments in the  $^1\text{H}$  NMR spectra were made using  $^1\text{H}$  COSY and  $^1\text{H}/^1\text{H}$  decoupling experiments. Mass spectroscopy was performed by the Ohio State University Chemistry Mass Spectrometry Facility using electrospray (ESI) or electron impact (EI) ionization. Infrared (IR) spectra were recorded on an FT-IR spectrometer as neat samples on NaCl plates. Unless otherwise specified, all reactions were run under an inert atmosphere of nitrogen. Solvents were freshly distilled before use. Yields refer to isolated material determined to be pure by NMR spectroscopy and thin layer chromatography (TLC), unless specified otherwise in the text.

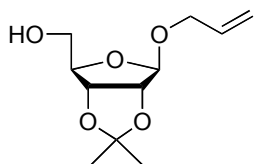

**(6-Allyloxy-2,2-dimethyltetrahydrofuro[3,4-*d*][1,3]dioxol-4-yl)methanol**

**(13).** Concentrated  $\text{H}_2\text{SO}_4$  (1.2 mL) was slowly added to a solution of D-ribose (15.0 g, 100 mmol) and allyl alcohol (68 mL) in acetone (60 mL) at 25 °C. The reaction mixture was stirred at reflux for 4 h. The reaction mixture was allowed to cool to 25 °C and  $\text{Na}_2\text{CO}_3$  (15.0 g) was added. The mixture was filtered and the filtrate was evaporated in *vacuo*. The residue was diluted with  $\text{CH}_2\text{Cl}_2$  (100 mL) and washed with water (70 mL). The aqueous phase was extracted with  $\text{CH}_2\text{Cl}_2$  (3 x). The collected organic extracts were dried ( $\text{MgSO}_4$ ), and evaporated in *vacuo*. The residue was purified by flash chromatography (silica, 20% EtOAc/hexane) to afford pure **13** (12.2 g, 53%) as a slightly yellow oil:  $^1\text{H}$  NMR ( $\text{CDCl}_3$ , 400 MHz)  $\delta$  5.82 (m, 1H), 5.22 (dd, 1H,  $J = 17.2, 2.6$  Hz), 5.18 (dd, 1H,  $J = 10.4, 2.4$  Hz), 5.06 (s, 1H), 4.79 (d, 1H,  $J = 6.0$  Hz), 4.57 (d, 1H, 5.9), 4.36 (s, 1H), 4.17 (dd, 1H,  $J = 5.4, 1.3$  Hz), 4.02 (dd, 1H,  $J = 6.4, 1.2$  Hz), 3.61 (m, 2H), 3.17 (dd, 1H,  $J = 10.1, 3.2$  Hz), 1.43 (s, 3H), 1.26 (s, 3H);  $^{13}\text{C}$  NMR ( $\text{CDCl}_3$ , 100 MHz)  $\delta$  133.0, 118.2, 112.2, 107.9, 88.3, 85.9, 81.4, 68.8, 63.9, 26.3, 24.6; IR (KBr)  $\nu_{\text{max}}$  3462, 3082, 2941  $\text{cm}^{-1}$ ; HRMS (ESI),  $m/z$  calcd for  $\text{C}_{11}\text{H}_{18}\text{O}_5\text{Na}$ : 253.1052; found: 253.1031.

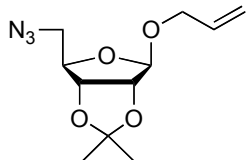

**4-Allyloxy-6-azidomethyl-2,2-dimethyltetrahydrofuro[3,4-*d*][1,3]dioxole**

**(14).** Zinc azide bis-pyridine (32.4 g, 0.105 mol) was slowly added to a solution of **13** (24.2 g, 0.105 mol), Ph<sub>3</sub>P (53.2 g, 0.211 mol), and diisopropyl azodicarboxylate (41.2 mL, 0.211 mol) in toluene (450 mL) at 0 °C. The reaction mixture was stirred overnight 16 h at 25 °C and was evaporated in *vacuo*. The residue was taken up in ether and triturated. The salts were filtered and the solvent was evaporated under reduced pressure. The crude product was purified by flash chromatography (silica, 10% EtOAc/hexane) to afford pure **14** (25.2 g, 94%) as a colorless oil: <sup>1</sup>H NMR (CDCl<sub>3</sub>, 500 MHz) δ 5.93 (m, 1H), 5.26 (dd, 1H, *J* = 17.1 Hz, *J* = 1.2 Hz), 5.19 (dd, 1H, *J* = 10.4 Hz, *J* = 1.2 Hz), 5.12 (s, 1H, C1-H), 4.64 (d, 1H, *J* = 6.0 Hz), 4.59 (d, 1H, *J* = 6.3 Hz), 4.28 (t, 1H, *J* = 7.3 Hz), 4.21 (ddm, 1H, *J* = 12.9 Hz, *J* = 5.2 Hz), 4.04 (m, 1H), 3.45 (dd, 1H, *J* = 12.8, 6.1 Hz), 3.26 (dd, 1H, *J* = 12.8, *J* = 7.9 Hz), 1.47 (s, 3H), 1.30 (s, 3H); <sup>13</sup>C NMR (CDCl<sub>3</sub>, 125 MHz) δ 133.5, 117.7, 112.7, 107.66, 85.5, 85.2, 82.1, 68.4, 53.7, 26.4, 24.9; IR (KBr) ν<sub>max</sub> 3082, 2940, 2103 cm<sup>-1</sup>; HRMS (ESI), *m/z* calcd for C<sub>11</sub>H<sub>17</sub>N<sub>3</sub>O<sub>4</sub>Na: 278.1117; found: 278.1117.

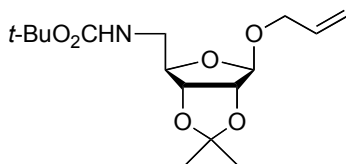

**(6-Allyloxy-2,2-dimethyltetrahydrofuro[3,4-*d*][1,3]dioxol-4-ylmethyl) Carbamic Acid, *tert*-Butyl Ester (15).**

A slurry of Ph<sub>3</sub>P (22.8 g, 87.0 mmol) was added to a solution of **14** (20.2 g, 79.13 mmol) in toluene (325 mL) at 25 °C. The reaction mixture was stirred for 1 h at 25 °C and water (68 mL) was added. The reaction mixture was stirred for 12 h at 25 °C and was evaporated in *vacuo*. The residue was dissolved in CH<sub>2</sub>Cl<sub>2</sub> (325 mL). Triethylamine (80.4 mL, 0.58 mol) was added followed by the addition of di-*tert*-butyl dicarbonate (19.0 g, 87.1 mmol) at 0 °C. The reaction mixture was stirred for 4 h at 25 °C and saturated aqueous NaHCO<sub>3</sub> was added. The aqueous layer was extracted with CH<sub>2</sub>Cl<sub>2</sub> (3 ×) and the combined organic extracts were dried (MgSO<sub>4</sub>), and evaporated in *vacuo*. The crude product was purified by flash chromatography (20% EtOAc/hexane) to afford **15** (30.4 g, 100%) as a colorless oil that solidified on standing: <sup>1</sup>H NMR (CDCl<sub>3</sub>, 500 MHz) δ 5.85 (m, 1H), 5.27 (app d,

1H,  $J = 17.1$  Hz), 5.16 (app d, 1H,  $J = 10.4$  Hz), 5.07 (br s, 2H), 4.61 (s, 2H), 4.26 (t, 1H,  $J = 5.5$  Hz), 4.15 (m, 1H), 3.96 (m, 1H), 3.27 (br s, 2H), 1.44 (s, 3H), 1.41 (s, 9H), 1.28 (s, 3H);  $^{13}\text{C}$  NMR ( $\text{CDCl}_3$ , 125 MHz)  $\delta$  156.8, 133.4, 117.4, 112.3, 107.8, 86.2, 85.6, 82.0, 79.5, 68.4, 43.6, 28.3, 26.4, 24.8; IR (KBr)  $\nu_{\text{max}}$  3342, 3058, 2938, 1694  $\text{cm}^{-1}$ ; HRMS (ESI),  $m/z$  calcd for  $\text{C}_{16}\text{H}_{27}\text{NO}_6\text{Na}$ : 352.1736; found: 352.1749.

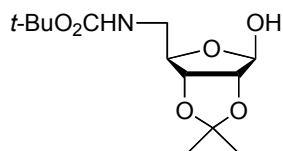

**(6-Hydroxy-2,2-dimethyltetrahydrofuro[3,4-*d*][1,3]dioxol-4-ylmethyl)carbamic Acid *tert*-Butyl Ester (16)**. A solution of  $\text{Et}_3\text{Al}$  (1.9 M in toluene, 49.8 mL) was slowly added to a solution of **15** (13.5 g, 41.41 mmol) and  $\text{NiCl}_2(\text{dppp})$  (2.33 g, 4.14 mmol) in toluene (490 mL) at 0 °C. The reaction mixture was stirred for 5 min at 0 °C and 4 h at 25 °C and water (50 mL) was added. The reaction mixture was stirred for 1 h at 25 °C, filtered, and evaporated in *vacuo*. The residue was purified by flash chromatography (35% EtOAc/hexane) to afford **16** (10.5 g, 86%) as a colorless oil:  $^1\text{H}$  NMR ( $\text{CDCl}_3$ , 500 MHz)  $\delta$  5.43 (s, 1H), 5.28 (br, 1H), 4.60 (m, 2H), 4.40 (s, 1H), 4.19 (s, 1H), 3.38 (br m, 1H), 3.20 (br m, 1H), 1.44 (s, 3H), 1.42 (s, 9H), 1.29 (s, 3H);  $^{13}\text{C}$  NMR ( $\text{CDCl}_3$ , 125 MHz)  $\delta$  156.9, 112.5, 103.1, 86.6, 86.4, 82.2, 80.0, 44.3, 28.5, 26.6, 25.0; IR (KBr)  $\nu_{\text{max}}$  3342, 3058, 2938, 1694  $\text{cm}^{-1}$ ; HRMS (ESI),  $m/z$  calcd for  $\text{C}_{13}\text{H}_{23}\text{NO}_6\text{Na}$ : 312.1423; found: 312.1432.

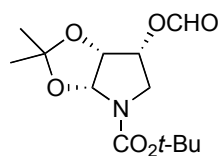

**6-Formyloxy-2,2-dimethyltetrahydro-[1,3]dioxolo[4,5-*b*]pyrrole-4-carboxylic Acid *tert*-Butyl Ester (17)**. Freshly prepared PhIO (14.9 g, 67.8 mmol) was slowly added to a solution of **16** (7.84 g, 27.1 mmol) and  $\text{I}_2$  (6.89 g, 27.1 mmol) in  $\text{CH}_2\text{Cl}_2$  (1600 mL) at 25 °C. The reaction mixture was stirred for 24 h at 25 °C and a saturated aqueous  $\text{Na}_2\text{S}_2\text{O}_3$  solution (300 mL) was added. The organic layer was washed with saturated aqueous NaCl, dried ( $\text{MgSO}_4$ ), and evaporated in *vacuo*. The residue was purified by flash chromatography (20% EtOAc/hexane) to afford pure **17** (7.79 g, 72%) as a colorless oil:  $^1\text{H}$  NMR ( $\text{CDCl}_3$ , 500 MHz, 60 °C)  $\delta$  8.04 (s, 1H), 5.85 (s br, 1H), 4.95 (m, 1H), 4.76 (t, 1H,  $J = 9.2$  Hz), 3.97 (br m, 1H),

3.38 (t, 1H,  $J = 10.4$  Hz), 1.49 (s, 3H), 1.44 (s, 9H), 1.34 (s, 3H);  $^{13}\text{C}$  NMR ( $\text{CDCl}_3$ , 125 MHz)  $\delta$  159.7, 153.5, 113.0, 81.0, 69.8, 60.2, 46.0, 28.4, 26.8, 26.3; IR (KBr)  $\nu_{\text{max}}$  2982, 2937, 2891, 1731, 1708  $\text{cm}^{-1}$ ; HRMS (ESI),  $m/z$  calcd for  $\text{C}_{13}\text{H}_{21}\text{NO}_6\text{Na}$  ( $M + \text{Na}$ ): 310.1267; found: 310.1264.

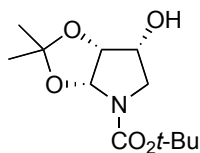

**6-Hydroxy-2,2-dimethyltetrahydro-[1,3]dioxolo[4,5-*b*]pyrrole-4-carboxylic Acid *tert*-Butyl Ester (18).** A solution of **17** (3.50 g, 12.2 mmol) in MeOH (55 mL) and  $\text{H}_2\text{O}$  (5 mL) at room temperature was treated with  $\text{K}_2\text{CO}_3$  (5.05 g, 36.6 mmol) for 4 h. The solvent was removed under reduced pressure and the residue was diluted with  $\text{CH}_2\text{Cl}_2$  (50 mL). The organic phase was washed with water and the aqueous layer was extracted with  $\text{CH}_2\text{Cl}_2$  (3  $\times$ ). The combined organic extracts were dried ( $\text{MgSO}_4$ ) and concentrated in *vacuo*. The residue was purified by flash chromatography (50% EtOAc/hexane) to afford **18** (3.10 g, 97%) as a colorless solid:  $^1\text{H}$  NMR ( $\text{CDCl}_3$ , 500 MHz, 60  $^\circ\text{C}$ )  $\delta$  5.85 (s br, 1H), 4.54 (t, 1H,  $J = 4.9$  Hz), 4.05 (s br, 1H), 3.85-3.89 (m, 1H), 3.10 (dd, 1H,  $J = 9.2, 10.6$  Hz), 2.41 (s br, 1H), 1.50 (s, 3H), 1.46 (s, 9H), 1.37 (s, 3H);  $^{13}\text{C}$  NMR ( $\text{CDCl}_3$ , 125 MHz)  $\delta$  154.0, 112.8, 89.0, 81.0, 78.8, 69.9, 49.7, 28.6, 27.0, 26.6; IR (KBr)  $\nu_{\text{max}}$  3442, 2980, 2935, 1704  $\text{cm}^{-1}$ ; HRMS (ESI),  $m/z$  calcd for  $\text{C}_{12}\text{H}_{21}\text{NO}_5\text{Na}$ : 282.1317; found: 282.1324.

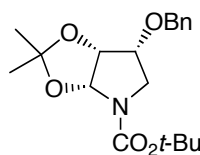

**6-Benzyloxy-2,2-dimethyltetrahydro-[1,3]dioxolo[4,5-*b*]pyrrole-4-carboxylic Acid *tert*-Butyl Ester (19).** A slurry of NaH (19.2 mg, 0.80 mmol) was added in one portion to a solution of **22** (102 mg, 0.40 mmol) and *n*- $\text{Bu}_4\text{NI}$  (15.0 mg, 0.04 mmol) in THF (4 mL) and DMF (0.4 mL) at 0  $^\circ\text{C}$ . The reaction mixture was stirred for 30 min at 0  $^\circ\text{C}$  and benzyl bromide (0.070 mL, 0.60 mmol) was added. The mixture was stirred for 1 h at 0  $^\circ\text{C}$  and saturated aqueous  $\text{NaHCO}_3$  (4 mL) was added. The aqueous layer was extracted with EtOAc (3  $\times$ ) and the combined organic extracts were washed with saturated aqueous NaCl (4 mL), dried ( $\text{Na}_2\text{SO}_4$ ), filtered, and the filtrate was evaporated in *vacuo*. The residue was purified by flash

chromatography (silica, 15% EtOAc/hexane) to afford pure **24** (84.3 mg, 89%) as a white solid:  $^1\text{H}$  NMR ( $\text{CDCl}_3$ , 500 MHz)  $\delta$  7.39-7.25 (br, 5H), 5.80-5.75, 5.67-5.61(2 parts, br, 1H), 4.71-4.54 (br m, 3H), 3.85-3.71 (br m, 1H), 3.70-3.63 (br t, 1H), 3.23 (br t, 1H), 1.51 (br d, 3H), 1.43 (s, 9H), 1.34 (br s, 3H);  $^{13}\text{C}$  NMR ( $\text{CDCl}_3$ , 125 MHz)  $\delta$  153.91 (153.68, rotamer), 137.52 (137.47), 128.5, 128.07 (128.00), 112.71 (112.58), 88.2 (88.05), 80.6, 78.3, 75.38 (74.85), 72.1, 46.75 (45.94), 28.3, 27.1, 26.37 (26.10); HRMS (ESI),  $m/z$  calcd for  $\text{C}_{19}\text{H}_{27}\text{NO}_5\text{Na}$ : 372.1787; found: 372.1798.

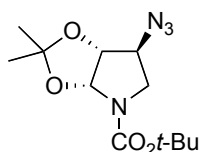

**6-Azido-2,2-dimethyltetrahydro-[1,3]dioxolo[4,5-*b*]pyrrole-4-carboxylic**

**Acid *tert*-Butyl Ester (22).** Diphenylphosphoryl azide (0.73 mL, 3.37 mmol) was slowly added to a solution of alcohol **18** (437 mg, 1.69 mmol),  $\text{Ph}_3\text{P}$  (884 mg, 3.37 mmol) and diisopropyl azodicarboxylate (0.66 mL, 3.37 mmol) in THF (6 mL) at 0 °C. The reaction mixture was allowed to warm to room temperature and was stirred overnight. The solvent was removed and the residue was dissolved in ether. The resulting white precipitate was filtered and the filtrate was concentrated under reduced pressure. The residue was purified by flash chromatography (5% EtOAc/toluene) to afford azide **22** (479 mg, 97%) as a colorless oil:  $^1\text{H}$  NMR ( $\text{CDCl}_3$ , 500 MHz, 60 °C)  $\delta$  5.97 (s br, 1H), 4.53 (d, 1H,  $J = 4.6$  Hz), 3.95 (d, 1H,  $J = 4.1$  Hz), 3.79 (s br, 1H), 3.64 (dd, 1H,  $J = 4.2, 12.3$  Hz), 1.53 (s, 9H), 1.47 (s, 3H), 1.37 (s, 3H);  $^{13}\text{C}$  NMR ( $\text{CDCl}_3$ , 125 MHz, 60 °C)  $\delta$  153.7, 112.1, 89.0, 83.1, 81.1, 63.2, 48.6, 28.5, 27.1, 26.2; IR (KBr)  $\nu_{\text{max}}$  2978, 2109, 1710  $\text{cm}^{-1}$ ; HRMS (ESI),  $m/z$  calcd for  $\text{C}_{12}\text{H}_{20}\text{N}_4\text{O}_4\text{Na}$ : 307.1377; found: 307.1390.

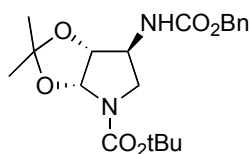

**6-Carbobenzyloxyamino-2,2-dimethyltetrahydro-[1,3]dioxolo [4,5-*b*] pyrrole-4-carboxylic**

**Acid *tert*-Butyl Ester (23).** Azide **22** (1 g, 3.52 mmol) in  $\text{CH}_3\text{CN}$  (15 mL) was added to a solution of  $\text{SnCl}_2$  (1.07 g, 5.63 mmol), thiophenol (1.73 mL, 16.9 mmol) and  $\text{Et}_3\text{N}$  (2.35 mL, 16.9 mmol) in  $\text{CH}_3\text{CN}$  (30 mL) at room temperature. The resulting mixture was stirred for 1 h and then, diluted with  $\text{CH}_2\text{Cl}_2$  and washed twice with 2N NaOH solution. The aqueous phase was extracted with  $\text{CH}_2\text{Cl}_2$  (3  $\times$ ). The collected organic extracts were dried

(MgSO<sub>4</sub>), filtered, and concentrated under reduced pressure to give the crude amine. The residue was dissolved in CH<sub>2</sub>Cl<sub>2</sub> (70 mL) and treated by Et<sub>3</sub>N (2.45 mL, 17.6 mmol) and benzyl chloroformate (2.00 mL, 14.08 mmol) at 0 °C. After being stirred during 2 h, the solution was washed with saturated NaHCO<sub>3</sub> aqueous solution. The aqueous phase was extracted three times with CH<sub>2</sub>Cl<sub>2</sub>. The collected organic extracts were dried (MgSO<sub>4</sub>), filtered and concentrated in *vacuo*. Purification by flash chromatography (silica, 25% EtOAc/hexane) afforded **23** (1.20 g, 79%) as a colorless oil: <sup>1</sup>H NMR (CDCl<sub>3</sub>, 500 MHz, 50 °C) δ 7.30-7.37 (m, 5H), 5.85 (s br, 1H), 5.12 (s, 2H), 4.75 (s br, 1H), 4.52 (s br, 1H), 4.11-4.17 (m, 1H), 3.66 (dd, 1H, J = 4.7, 11.9 Hz), 3.53 (d, 1H, J = 11.9 Hz), 1.48 (s, 9H), 1.45 (s, 3H), 1.32 (s, 3H); <sup>13</sup>C NMR (CDCl<sub>3</sub>, 125 MHz, 50 °C) δ 155.7, 154.1, 136.4, 128.6, 128.3, 128.3, 111.8, 88.5, 85.5, 80.9, 67.2, 54.7, 49.4, 28.5, 27.1, 26.1; IR (KBr) ν<sub>max</sub> 3315, 2979, 2930, 1697 cm<sup>-1</sup>; HRMS (ESI), *m/z* calcd for C<sub>20</sub>H<sub>28</sub>N<sub>2</sub>O<sub>6</sub>Na: 415.1840; found: 415.1842.

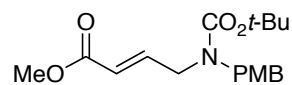

**4-[*tert*-Butoxycarbonyl-(4-methoxybenzyl)amino]but-2-enoic acid methyl ester (**25**).** *p*-Methoxybenzylamine (1.43 mL, 11.0 mmol) was slowly added to a solution of methyl 4-bromocrotonate (1.40 mL, 10.0 mmol) and EtN(*i*-Pr)<sub>2</sub> (6.64 mL, 33.0 mmol) in THF (50 mL) at 25 °C. The reaction mixture was stirred for 12 h at 25 °C and saturated aqueous NaHCO<sub>3</sub> (50 mL) was added. The aqueous layer was extracted with EtOAc (3 ×) and the combined organic extracts were dried (Na<sub>2</sub>SO<sub>4</sub>), filtered, and the filtrate was evaporated in *vacuo*. The residue was dissolved in CH<sub>2</sub>Cl<sub>2</sub> (50 mL) at 25 °C and Et<sub>3</sub>N (3.34 mL, 24.0 mmol) and (*t*-BuOCO)<sub>2</sub>O (2.76 mL, 12.0 mmol) were added. The reaction mixture was stirred for 3 h at 25 °C and saturated aqueous NaHCO<sub>3</sub> (50 mL) was added. The aqueous layer was extracted with EtOAc (3 ×) and the combined organic extracts were dried (Na<sub>2</sub>SO<sub>4</sub>), filtered, and the filtrate was evaporated in *vacuo*. The residue was purified by flash chromatography (silica, 10% EtOAc/hexane) to afford pure **25** (2.35 g, 71%) as a colorless oil: <sup>1</sup>H NMR (CDCl<sub>3</sub>, 500 MHz, 60°C) δ 7.12 (d, 2H, *J* = 8.5 Hz), 6.84 (d, 2H, *J* = 8.5 Hz), 6.79 (m, 1H), 5.82 (d, 1H, *J* = 15.9 Hz), 4.35 (br, 2H), 3.88 (br, 2H), 3.77 (s, 3H), 3.72 (s, 3H), 1.47 (s, 9H); HRMS (ESI), *m/z* calcd for C<sub>18</sub>H<sub>25</sub>NO<sub>5</sub>Na: 358.1631; found: 358.1617.

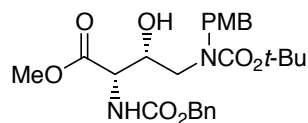

**2-Benzyloxycarbonylamino-4-*tert*-butoxycarbonyl-(4-methoxybenzyl) amino-3-hydroxy butyric acid methyl ester (26).** A slurry of benzyl carbamate (234 mg, 1.55 mmol) was added in one portion to a solution of NaOH (60.0 mg, 1.50 mmol) in H<sub>2</sub>O (3.8 mL) and *n*-PrOH (2.3 mL) at 25 °C. After the solution was completely clear, *t*-BuOCl (0.17 mL, 1.50 mmol) was added to the reaction mixture and the solution was stirred in the dark for 5 min at 25 °C. The reaction mixture was cooled to 0 °C in the dark and a solution of (DHQD)<sub>2</sub>AQN (21 mg, 0.025 mmol) in *n*-PrOH (2.0 mL) was added followed by the addition of **31** (167 mg, 0.50 mmol) and K<sub>2</sub>OsO<sub>4</sub>·2H<sub>2</sub>O (7.4 mg, 0.020 mmol). The reaction mixture was stirred for 6 h at 0 °C in the dark and saturated aqueous Na<sub>2</sub>S<sub>2</sub>O<sub>3</sub> (5 mL) was added. The aqueous layer was extracted with EtOAc (3 ×) and the combined organic extracts were dried (Na<sub>2</sub>SO<sub>4</sub>), filtered, and the filtrate was evaporated in *vacuo*. The residue was purified by flash chromatography (silica, 5% acetone/CH<sub>2</sub>Cl<sub>2</sub>) to afford **26** (168.2 mg, 67%) as a colorless oil, with slight contamination of benzyl carbamate that was used without further purification.

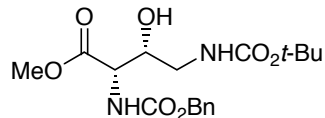

**2-Benzyloxycarbonylamino-4-*tert*-butoxycarbonylamino-3-hydroxy butyric acid methyl ester.** A solution of (NH<sub>4</sub>)<sub>3</sub>Ce(NO<sub>3</sub>)<sub>6</sub> (605 mg, 1.1 mmol) in H<sub>2</sub>O (2 mL) was added to a solution of crude **26** (168.2 mg, 0.34 mmol) in CH<sub>3</sub>CN (6 mL) at 25 °C. The reaction mixture was stirred for 5 min at 25 °C and EtOAc (5 mL) was added. The aqueous layer was extracted with EtOAc (3 ×) and the combined organic extracts were dried (Na<sub>2</sub>SO<sub>4</sub>), filtered, and the filtrate was evaporated in *vacuo*. The residue was purified by flash chromatography (silica, 20% EtOAc/hexane) to afford the pure carbamate (112.0 mg, 56% for 2 steps) as a white solid: <sup>1</sup>H NMR (CDCl<sub>3</sub>, 500 MHz) δ 7.32 (m, 5H), 5.80 (br, 1H), 5.28 (br, 1H), 5.10 (br s, 2H), 4.44 (br, 1H), 4.20 (br, 1H), 3.76 (br, 1H), 3.73 (s, 3H), 3.35 (br, 1H), 3.00 (br, 1H), 1.40 (s, 9H); <sup>13</sup>C NMR (CDCl<sub>3</sub>, 125 MHz) δ 170.8, 159.3, 156.1, 136.2, 128.4, 128.1, 127.9, 80.0, 71.6, 67.2, 56.5, 44.0, 28.3; HRMS (ESI), *m/z* calcd for C<sub>18</sub>H<sub>26</sub>N<sub>2</sub>O<sub>7</sub>Na: 405.1638; found: 405.1609.



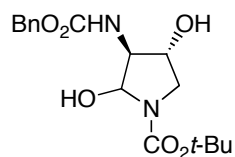

**3-Benzyloxycarbonylamino-2,4-dihydroxypyrrolidine-1-carboxylic Acid *tert*-Butyl Ester (27).** A solution of *i*-Bu<sub>2</sub>AlH (1.0 M in THF, 1.21 mL) was slowly added to a solution of the above carbamate (84.8 mg, 0.22 mmol) in THF (2 mL) at  $-78$  °C. The reaction mixture was stirred for 14 h at  $-78$  °C and aqueous K<sub>2</sub>HPO<sub>4</sub>/KH<sub>2</sub>PO<sub>4</sub> buffer (1.0 M, pH 7, 5 mL) was added. The aqueous layer was extracted with EtOAc (3 ×) and the combined organic extracts were dried (Na<sub>2</sub>SO<sub>4</sub>), filtered, and the filtrate was evaporated in *vacuo*. The residue was purified by flash chromatography (silica, 25% EtOAc/hexane) to afford pure **27** (61.5 mg, 67%) as an unstable pale yellow oil: <sup>1</sup>H NMR (CDCl<sub>3</sub>, 500 MHz, 60 °C) δ 7.33 (m, 5H), 5.60-5.20 (br, 2H), 5.12 (br, 2H), 4.40-4.15 (br, 1H), 3.97 (br, 1H), 3.83-3.43 (br, 2H), 3.15 (m, 1H), 1.47 (s, 9H); <sup>13</sup>C NMR (CDCl<sub>3</sub>, 125 MHz) δ 160.8, 154.8, 135.9, 128.6, 128.3, 128.2, 81.1, 79.1, 74.8, 67.4, 59.5, 50.3, 28.3; HRMS (ESI), *m/z* calcd for C<sub>17</sub>H<sub>24</sub>N<sub>2</sub>O<sub>6</sub>Na: 375.1532; found: 375.1558.

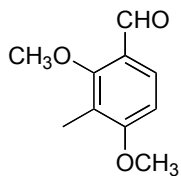

**2,4-Dimethoxy-3-methylbenzaldehyde (29).** A solution of SnCl<sub>4</sub> (1.0 M in CH<sub>2</sub>Cl<sub>2</sub>, 95 mL, 95 mmol) was added dropwise to a solution of 2,6-dimethoxytoluene **28** (11.11 g, 73.09 mmol) in CH<sub>2</sub>Cl<sub>2</sub> (220 mL) at 0 °C. The reaction mixture was stirred for 1 h at 0 °C and Cl<sub>2</sub>CHOCH<sub>3</sub> [CAUTION: HIGHLY TOXIC; LACHRYMATOR] (7.94 mL, 87.7 mmol) was slowly added. The reaction mixture was stirred for 1 h at 0 °C and was allowed to warm to 25 °C. The reaction mixture was poured onto crushed ice (40 mL) and was stirred for 1 h at 25 °C. The aqueous layer was extracted with EtOAc (3 ×) and the combined organic extracts were washed with saturated aqueous NaHCO<sub>3</sub> and saturated aqueous NaCl, dried (MgSO<sub>4</sub>), filtered, and the filtrate was evaporated *in vacuo*. Recrystallization of the residue from hexane afforded **29** as colorless, needle-like crystals (12.36 g, 94%): <sup>1</sup>H NMR (CDCl<sub>3</sub>, 400 MHz) δ 10.20 (s, 1H), 7.71 (d, 1H, *J* = 8.8 Hz), 6.71 (d, 1H, *J* = 8.7 Hz), 3.88 (s, 3H), 3.83 (s, 3H), 2.14 (s, 3H); <sup>13</sup>C NMR (CDCl<sub>3</sub>, 100 MHz) δ 189.2, 164.1, 162.7, 128.0, 122.9, 120.2, 106.6, 63.2, 56.0, 8.6; HRMS (ESI), *m/z* calcd for C<sub>10</sub>H<sub>12</sub>O<sub>3</sub>Na: 203.0679; found: 203.0693.

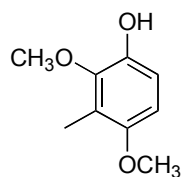

**2,4-Dimethoxy-3-methylphenol (30).** *m*-Chloroperbenzoic acid (33.8 g,

0.137 mol) was added in one portion to a solution of **29** (12.4 g, 68.7 mmol) in CH<sub>2</sub>Cl<sub>2</sub> (185 mL) at 0 °C, and the reaction mixture was stirred for 3 h at 0 °C. The reaction mixture was washed with saturated aqueous K<sub>2</sub>CO<sub>3</sub> (3 ×) and the solvent was evaporated in *vacuo*. The residue was dissolved in MeOH (120 mL) at 0 °C and KOH (5.77 g, 0.103 mmol) was added. The reaction mixture was stirred for 1 h at 0 °C and the solvent evaporated in *vacuo*. The residue was dissolved in ether (300 mL) and acidified with aqueous 3N HCl. The organic layer was washed with water (2 ×), saturated aqueous NaCl, dried (MgSO<sub>4</sub>), and evaporated in *vacuo*. Purification of the residue by flash chromatography (silica, 20% EtOAc-hexane) afforded pure **30** (10.1 g, 87%) as a yellow oil: <sup>1</sup>H NMR (CDCl<sub>3</sub>, 400 MHz) δ 6.76 (d, 1H, *J* = 8.8 Hz), 6.54 (d, 1H, *J* = 8.8 Hz), 5.48 (s, 1H), 3.78 (s, 6H), 2.19 (s, 3H); <sup>13</sup>C NMR (CDCl<sub>3</sub>, 100 MHz) δ 152.0, 146.1, 143.0, 120.1, 111.8, 106.9, 60.9, 56.1, 9.4; IR (KBr) ν<sub>max</sub> 3425, 2942 cm<sup>-1</sup>.

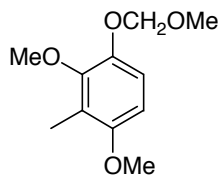

**1,3-Dimethoxy-4-methoxymethoxy-2-methylbenzene (31).** A slurry of NaH

(3.26 g, 136 mmol) was added in one portion to a solution of **30** (11.4 g, 68.0 mmol) in THF (340 mL) and DMF (34 mL) at 0 °C. The reaction mixture was stirred 1 h at 25 °C and chloromethyl methyl ether [CAUTION: HIGHLY TOXIC; LACHRYMATOR] (5.68 mL, 74.8 mmol) was slowly added. The reaction mixture was stirred 1 h at 25 °C and ether (500 mL) was added. The reaction mixture was washed with saturated aqueous NaHCO<sub>3</sub> (100 mL) and saturated aqueous NaCl (100 mL). The organic layer was dried (Na<sub>2</sub>SO<sub>4</sub>), filtered, and the filtrate was evaporated in *vacuo*. The residue was distilled under vacuum to afford **31** as a colorless oil (11.72 g, 89%, 64 °C/0.2 mm Hg): <sup>1</sup>H NMR (CDCl<sub>3</sub>, 500 MHz) δ 6.90 (d, 1H, *J* = 9.2 Hz), 6.51 (d, 1H, *J* = 9.2 Hz), 5.12 (s, 2H), 3.79 (s, 3H), 3.76 (s, 3H), 3.50 (s, 3H), 2.13 (s, 3H); <sup>13</sup>C NMR (CDCl<sub>3</sub>, 125 MHz) δ 153.6, 149.3, 144.4, 129.9, 114.5, 105.5, 96.1, 60.5, 56.1, 55.9, 9.0; HRMS (ESI), *m/z* calcd for C<sub>11</sub>H<sub>16</sub>O<sub>4</sub>Na: 235.0947; found: 235.0933.

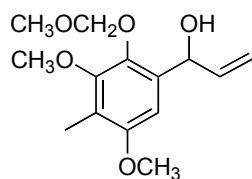

**1-(3,5-Dimethoxy-2-methoxymethoxy-4-methylphenyl)prop-2-en-1-ol**

**(32)**. A solution of *n*-BuLi (2.32 M in hexane, 37.0 mL, 86.0 mmol) was slowly added to a solution of **31** (11.4 g, 53.8 mmol) in THF (200 mL) at 0 °C. The reaction mixture was stirred for 1 h at 0 °C and freshly distilled acrolein (4.82 mL, 71.5 mmol) was added. The reaction mixture was allowed to warm to 25 °C and saturated aqueous NaHCO<sub>3</sub> was added. The aqueous layer was extracted with CH<sub>2</sub>Cl<sub>2</sub> (3 ×) and the combined organic extracts were dried (MgSO<sub>4</sub>), filtered, and the filtrate was evaporated in *vacuo*. The residue was purified by flash chromatography (silica, 25% EtOAc-hexane) to afford pure **32** (12.4 g, 86%) as a colorless oil: <sup>1</sup>H NMR (CDCl<sub>3</sub>, 400 MHz) δ 6.60 (s, 1H), 6.07-6.12 (m, 1H), 5.53-5.55 (m, 1H), 5.43 (dd, 1H, *J* = 17.2 Hz, *J* = 1.5 Hz), 5.24 (dd, 1H, *J* = 10.5 Hz, *J* = 1.5 Hz), 5.06 (dd, 1H, *J* = 5.8, 16.1 Hz), 3.78 (s, 3H), 3.76 (s, 3H), 3.56 (s, 3H), 3.26 (br s, 1H), 2.11 (s, 3H); <sup>13</sup>C NMR (CDCl<sub>3</sub>, 100 MHz) δ 154.9, 151.4, 142.1, 139.2, 134.2, 120.8, 114.8, 104.3, 99.8, 69.2, 60.3, 57.6, 55.8, 9.0; IR (KBr) ν<sub>max</sub> 3453, 3087, 2938, 1641 cm<sup>-1</sup>; HRMS (ESI), *m/z* calcd for C<sub>14</sub>H<sub>20</sub>O<sub>5</sub>Na: 291.1203; found: 291.1180.

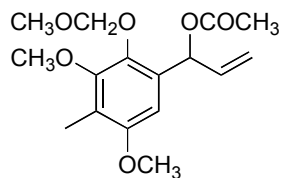

**Acetic acid 1-(3,5-dimethoxy-2-methoxymethoxy-4-methylphenyl)allyl ester (33)**

Acetic anhydride (8.70 mL, 92.3 mmol) was slowly added to a solution of **32** (12.37 g, 46.16 mmol), Et<sub>3</sub>N (19.3 mL, 0.138 mol) and 4-(*N,N*-dimethylamino)pyridine (catalytic) in CH<sub>2</sub>Cl<sub>2</sub> (190 mL) at 25 °C. The reaction mixture was stirred for 3 h at 25 °C and saturated aqueous NaHCO<sub>3</sub> was added. The aqueous layer was extracted with CH<sub>2</sub>Cl<sub>2</sub> (3 ×) and the combined organic extracts were dried (MgSO<sub>4</sub>), filtered, and the filtrate was evaporated in *vacuo*. The residue was purified by flash chromatography (silica, 25% EtOAc-hexane) to afford pure **33** (12.7 g, 89%) as a colorless oil: <sup>1</sup>H NMR (CDCl<sub>3</sub>, 400 MHz) δ 6.70 (dt, 1H, *J* = 5.1, 1.5 Hz), 6.59 (s, 1H), 6.04 (ddd, 1H, *J* = 5.12, 10.5, 17.2 Hz), 5.20-5.29 (m, 2H), 5.08 (s, 2H), 3.80 (s, 3H), 3.78 (s, 3H), 3.61 (s, 3H), 2.12 (s, 3H), 2.10 (s, 3H); <sup>13</sup>C NMR (CDCl<sub>3</sub>, 100 MHz) δ 169.8, 154.8, 151.7, 141.6, 136.3, 130.0, 121.4, 116.1, 104.4, 99.6, 70.8, 60.4, 57.8, 55.9, 21.3,

9.1; IR (KBr)  $\nu_{\max}$  2937, 1743, 1643  $\text{cm}^{-1}$ ; HRMS (ESI),  $m/z$  calcd for  $\text{C}_{16}\text{H}_{22}\text{O}_6\text{Na}$ : 333.1314; found: 333.1309.

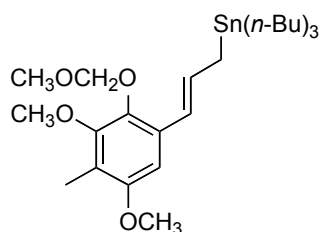

**Tri-*n*-butyl-[3-(3,5-dimethoxy-2-(methoxymethoxy) methoxy-4-methylphenyl)allyl]stannane (34).** A solution of  $\text{SmI}_2$  (0.1 M in THF, 95 mL) was added over 2 h to a solution of **33** (1.18 g, 3.81 mmol),  $\text{Pd}(\text{PPh}_3)_4$  (220 mg, 0.19 mmol), and  $n\text{-Bu}_3\text{SnCl}$  (1.54 mL, 5.71 mmol) in THF (10 mL) at 0 °C. The reaction mixture was stirred for 12 h at 25 °C and was quenched by the addition of saturated aqueous  $\text{NaHCO}_3$ . The aqueous phase was extracted with  $\text{CH}_2\text{Cl}_2$  (3  $\times$ ) and the combined organic extracts were dried ( $\text{MgSO}_4$ ), filtered, and the filtrate was evaporated in *vacuo*. The residue was purified by flash chromatography (silica, 5%  $\text{Et}_3\text{N}$ /hexane) to afford pure **34** (1.59 g, 77%) as a colorless oil:  $^1\text{H}$  NMR ( $\text{CDCl}_3$ , 400 MHz)  $\delta$  6.64 (s, 1H), 6.52 (d, 1H,  $J = 15.7$  Hz), 6.31-6.40 (m, 1H), 5.01 (s, 2H), 3.80 (s, 3H), 3.78 (s, 3H), 3.59 (s, 3H), 2.11 (s, 3H), 2.00 (d, 2H,  $J = 8.7$  Hz), 1.49-1.55 (m, 6H), 1.29-1.34 (m, 6H), 0.88-0.94 (m, 15H);  $^{13}\text{C}$  NMR ( $\text{CDCl}_3$ , 125 MHz)  $\delta$  154.6, 152.1, 140.5, 131.6, 130.4, 119.6, 118.7, 102.0, 99.4, 60.4, 57.7, 55.7, 29.3, 27.5, 16.6, 13.7, 9.7, 9.0; IR (KBr)  $\nu_{\max}$  2924, 1683, 1631  $\text{cm}^{-1}$ ; HRMS (ESI),  $m/z$  calcd for  $\text{C}_{27}\text{H}_{50}\text{O}_5\text{SnNa}$  ( $\text{M} + \text{Na} + \text{CH}_3\text{OH}$ ): 597.2572; found: 597.2544.

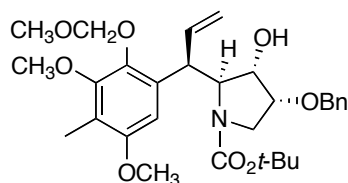

**4-Benzyloxy-2-[1-(3,5-dimethoxy-2-methoxymethoxy-4-methylphenyl) allyl]-3-hydroxypyrrolidine-1-carboxylic Acid *tert*-Butyl Ester (36).** Boron trifluoride etherate (0.38 mL, 3.0 mmol) was added over 30 min to a solution of **19** (797.2 mg, 3.0 mmol) in  $\text{CH}_2\text{Cl}_2$  (15 mL) at  $-78$  °C. The reaction mixture was stirred for 30 min at  $-78$  °C and stannane **34** (2.15 g, 3.98 mmol) was added. The reaction mixture was stirred for 30 min at  $-78$  °C and aqueous  $\text{K}_2\text{HPO}_4/\text{KH}_2\text{PO}_4$  buffer (1.0 M, pH 7, 15 mL) was added. The aqueous

layer was extracted with EtOAc (3 ×) and the combined organic extracts were dried (Na<sub>2</sub>SO<sub>4</sub>), filtered, and the filtrate was evaporated in *vacuo*. The residue was purified by flash chromatography (silica, 15% EtOAc/hexane) to afford pure **36** (1.22 g, 75%) as a pale yellow oil: <sup>1</sup>H NMR (CDCl<sub>3</sub>, 500 MHz) δ 6.56-6.45 (br, 1H), 6.19-6.03 (m, 1H), 5.05-4.87 (m, 4H), 4.54-4.44 (m, 2H), 4.27-3.36 (br, 16H), 2.59-2.37 (br, 1H), 2.08 (br, 3H), 1.49-1.40 (br, 9H); <sup>13</sup>C NMR (CDCl<sub>3</sub>, 125 MHz) δ 155.2, 154.8, 151.6, 142.0, 138.8, 137.2, 132.1, 128.5, 128.1, 127.8, 119.6, 115.8, 104.7, 99.6, 79.3, 71.9, 70.7, 67.8, 60.2, 57.6, 55.8, 48.5, 44.8, 29.7, 28.4, 8.8; HRMS (ESI), *m/z* calcd for C<sub>30</sub>H<sub>41</sub>NO<sub>8</sub>Na: 566.2724; found: 566.2680.

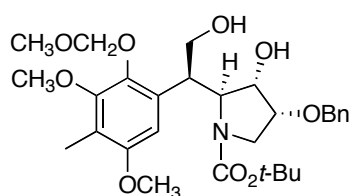

**4-Benzyloxy-2-[1-(3,5-dimethoxy-2-methoxymethoxy-4-methylphenyl)-2-hydroxyethyl]-3-hydroxypyrrolidine-1-carboxylic Acid *tert*-Butyl Ester (**39**).** A stream of O<sub>3</sub> in O<sub>2</sub> was slowly bubbled into a solution of **36** (164 mg, 0.30 mmol) in MeOH (7 mL) at -78 °C. The progress of the reaction was carefully monitored by TLC and N<sub>2</sub> was bubbled into the reaction mixture for 30 min immediately after the reaction was judged complete. The reaction mixture was warmed to 0 °C and NaBH<sub>4</sub> (330 mg, 8.0 mmol) was added. The reaction mixture was stirred for 1 h at 0 °C and was evaporated in *vacuo*. The residue was purified by flash chromatography (silica, 20% EtOAc/hexane) to afford pure **39** (92.5 mg, 62%) as a colorless oil: <sup>1</sup>H NMR (CDCl<sub>3</sub>, 500 MHz) δ 7.33-7.25 (m, 5H), 6.98 (s, 1H), 4.95-4.90 (app q, 2H), 4.58-4.52 (br, 1H), 4.52-4.43 (app q, 2H), 4.36-4.31 (m, 1H), 4.31-4.26 (br, 1H), 3.87-3.80 (br, 1H), 3.79 (br, 1H), 3.78 (s, 3H), 3.72 (s, 3H), 3.65-3.58 (m, 1H), 3.58-3.51 (br, 1H), 3.48-3.42 (br, 1H), 3.36 (s, 3H), 2.97-2.91 (br d, 1H), 2.58-2.40 (br, 1H), 2.12 (s, 1H), 2.09 (s, 3H), 1.54-1.44 (br, 9H); <sup>13</sup>C NMR (CDCl<sub>3</sub>, 125 MHz) δ 157.1, 154.7, 151.0, 141.8, 137.1, 132.0, 128.5, 128.1, 127.8, 119.3, 105.7, 99.7, 80.7, 72.0, 71.5, 64.6, 62.8, 60.1, 57.4, 55.7, 48.6, 41.2, 28.3, 8.8; HRMS (ESI), *m/z* calcd for C<sub>29</sub>H<sub>41</sub>NO<sub>9</sub>Na: 570.2674; found: 570.2668.

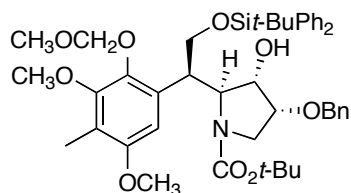

**4-Benzyloxy-2-[2-(*tert*-butyldiphenylsilyloxy)-1-(3,5-dimethoxy-2-methoxymethoxy-4-methylphenyl)ethyl]-3-hydroxy-pyrrolidine-1-carboxylic**

**Acid *tert*-Butyl Ester (40).** *tert*-Butyldiphenylsilyl chloride (0.063 mL, 0.24 mmol) was added to a solution of **39** (102 mg, 0.19 mmol), Et<sub>3</sub>N (0.034 mL, 0.24 mmol), and 4-(dimethylamino)pyridine (10 mg) in CH<sub>2</sub>Cl<sub>2</sub> (1 mL) at 25 °C. The reaction mixture was stirred for 3 h at 25 °C and saturated aqueous NaHCO<sub>3</sub> (1 mL) was added. The aqueous layer was extracted with EtOAc (3 ×) and the combined organic extracts were dried (Na<sub>2</sub>SO<sub>4</sub>), filtered, and the filtrate was evaporated in *vacuo*. The residue was purified by flash chromatography (silica, 10% EtOAc/hexane) to afford pure **40** (149 mg, 99%) as a colorless oil: <sup>1</sup>H NMR (CDCl<sub>3</sub>, 500 MHz) δ 7.60-7.50 (m, 2H), 7.41-7.20 (m, 13H), 6.58-6.38 (br, 1H), 5.10-4.90 (m, 2H), 4.54-4.44 (m, 2H), 4.27-4.18 (br, 1H), 4.14-3.98 (br, 2H), 3.97-3.82 (br, 2H), 3.74 (s, 3H), 3.69-3.64 (br, 3H), 3.57-3.48 (br, 4H), 3.45-3.32 (br, 1H), 2.52-3.38 (br, 1H), 2.20-2.12 (br, 3H), 1.44-1.18 (br, 9H), 1.00-0.86 (br, 9H); <sup>13</sup>C NMR (CDCl<sub>3</sub>, 125 MHz) δ 155.4, 155.2, 154.7, 151.7, 151.6, 143.1, 142.8, 137.3, 135.6, 135.5, 133.8, 133.6, 133.5, 133.4, 131.9, 129.6, 129.5, 129.3, 128.5, 128.1, 127.7, 127.6, 127.4, 127.3, 119.4, 119.1, 104.2, 99.7, 99.6, 79.8, 79.4, 72.1, 71.1, 66.2, 65.8, 60.2, 57.3, 55.6, 55.5, 48.4, 48.1, 28.3, 28.1, 26.8, 26.7, 19.1, 8.9 (many are rotamers); HRMS (ESI), *m/z* calcd for C<sub>45</sub>H<sub>59</sub>O<sub>9</sub>NSiNa: 808.3851; found: 808.3880.

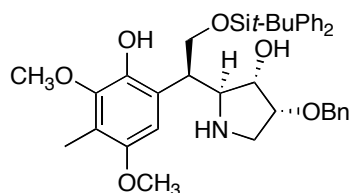

**4-Benzyloxy-2-[2-(*tert*-butyldiphenylsilyloxy)-1-(2-hydroxy-3,5-dimethoxy-4-methylphenyl)ethyl]pyrrolidin-3-ol (41).**

Trifluoroacetic acid (1 mL) was added to a solution of **40** (149 mg, 0.19 mmol) in CH<sub>2</sub>Cl<sub>2</sub> (1 mL) at 25 °C. The reaction mixture was stirred for 10 min at 25 °C, cooled to -40 °C and aqueous K<sub>2</sub>HPO<sub>4</sub>/KH<sub>2</sub>PO<sub>4</sub> buffer (1.0 M, pH 7, 5 mL) was added followed by the addition of NaOH (520 mg). The aqueous layer was extracted with EtOAc (3 ×) and the combined organic extracts were dried (Na<sub>2</sub>SO<sub>4</sub>), filtered, and the filtrate was evaporated in *vacuo*. The residue was purified by flash chromatography (silica,

50% EtOAc/hexane) to afford pure the pyrrolidine/phenol **41** (97.1 mg, 79%) as a pale yellow oil:  $^1\text{H}$  NMR ( $\text{CDCl}_3$ , 500 MHz)  $\delta$  7.60 (m, 3H), 7.44-7.23 (m, 12H), 6.19 (s, 1H), 4.53 (s, 2H), 4.15 (m, 1H), 3.94 (m, 2H), 3.74 (s, 3H), 3.69 (s, 3H), 3.49 (m, 1H), 3.25 (m, 1H), 2.98 (dd, 1H,  $J = 9.8, 4.9$  Hz), 2.70 (d, 1H,  $J = 4.9$  Hz), 2.49 (dd, 1H,  $J = 9.8, 4.9$  Hz), 2.09 (s, 3H), 0.96 (s, 9H);  $^{13}\text{C}$  NMR ( $\text{CDCl}_3$ , 125 MHz)  $\delta$  153.4, 150.9, 143.7, 137.4, 135.6, 134.7, 133.6, 133.2, 129.7, 129.5, 128.5, 128.1, 127.7, 127.7, 127.5, 124.4, 119.5, 105.8, 79.1, 72.8, 72.1, 65.3, 64.1, 60.9, 56.3, 53.8, 47.7, 30.3, 26.8, 19.1, 8.9; HRMS (ESI),  $m/z$  calcd for  $\text{C}_{38}\text{H}_{47}\text{NO}_6\text{Si} + \text{H}$ : 642.3245; found: 642.3195.

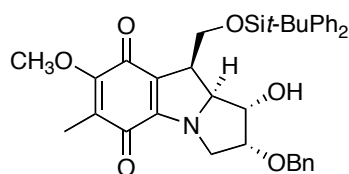

**2-Benzyloxy-8-(tert-butyldiphenylsilyloxymethyl)-1-hydroxy-6-methoxy-5-methyl-2,3,8,8a-tetrahydro-1H-3a-azacyclopenta[*a*]-indene-4,7-dione (42).** A solution of  $(\text{NH}_4)_3\text{Ce}(\text{NO}_3)_6$  (11.0 mg, 8.7  $\mu\text{mol}$ ) in  $\text{H}_2\text{O}$  (0.08 mL) was added to a solution of the above pyrrolidine/phenol (5.6 mg, 8.7  $\mu\text{mol}$ ) in  $\text{CH}_3\text{CN}$  (0.2 mL) at 25  $^\circ\text{C}$ . The reaction mixture was stirred for 5 min at 25  $^\circ\text{C}$ , cooled to 0  $^\circ\text{C}$  and saturated aqueous  $\text{NaHCO}_3$  (0.2 mL) and EtOAc (0.5 mL) were added. The aqueous layer was extracted with EtOAc (3  $\times$ ) and the combined organic extracts were dried ( $\text{Na}_2\text{SO}_4$ ), filtered, and the filtrate was evaporated in *vacuo*. The residue was purified by flash chromatography (silica, 5% EtOAc/hexane) to afford pure **48** (1.1 mg, 21%) as a pink oil:  $^1\text{H}$  NMR ( $\text{CDCl}_3$ , 500 MHz)  $\delta$  7.74 (m, 3H), 7.49-7.34 (m, 12H), 5.14 (m, 1H), 5.04 (d, 2H,  $J = 3.7$  Hz), 4.84 (d, 1H,  $J = 11.6$  Hz), 4.70 (d, 1H,  $J = 12.2$  Hz), 4.47 (dd, 1H,  $J = 12.2, 7.3$  Hz), 4.31 (dd, 1H,  $J = 12.2, 7.3$  Hz), 4.04 (dd, 1H,  $J = 12.2, 7.3$  Hz), 4.01 (s, 3H), 3.42 (dd, 1H,  $J = 14.6, 7.3$  Hz), 3.35 (dd, 1H,  $J = 14.0, 6.7$  Hz), 2.77 (d, 1H,  $J = 1.8$  Hz), 2.13 (s, 1H), 2.00 (s, 3H), 1.15 (s, 9H); HRMS (ESI),  $m/z$  calcd for  $\text{C}_{37}\text{H}_{41}\text{NO}_6\text{SiNa}$ : 646.2601; found: 646.2655.

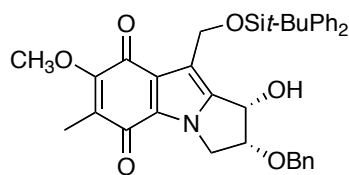

**2-Benzyloxy-8-(tert-butyldiphenylsilyloxymethyl)-1-hydroxy-6-methoxy-5-methyl-2,3-dihydro-1H-3a-azacyclopenta[*a*]indene-4,7-dione (43).** A solution

of MeSO<sub>2</sub>Cl (2.8  $\mu$ l, 0.036 mmol) in CH<sub>2</sub>Cl<sub>2</sub> (0.1 mL) was slowly added to a solution of **42** (7.4 mg, 0.012 mmol) and Et<sub>3</sub>N (8.4  $\mu$ l, 0.060 mmol) in CH<sub>2</sub>Cl<sub>2</sub> (0.1 mL) at -20 °C. The reaction mixture was stirred for 3 h at 25 °C and aqueous K<sub>2</sub>HPO<sub>4</sub>/KH<sub>2</sub>PO<sub>4</sub> buffer (1.0 M, pH 7, 0.2 mL) was added. The aqueous layer was extracted with EtOAc (3  $\times$ ) and the combined organic extracts were dried (Na<sub>2</sub>SO<sub>4</sub>), filtered, and the filtrate was evaporated in *vacuo*. The residue was purified by flash chromatography (silica, 5% EtOAc/hexane) to afford **43** with some contamination of **42** (3.9 mg, 56%) as a pink oil: <sup>1</sup>H NMR (CDCl<sub>3</sub>, 500 MHz)  $\delta$  7.65 (m, 3H), 7.43-7.26 (m, 12H), 5.21 (s, 1H), 5.07 (d, 1H, *J* = 15.3 Hz), 4.95 (d, 1H, *J* = 15.0 Hz), 4.75 (d, 1H, *J* = 11.9 Hz), 4.61 (d, 1H, *J* = 11.9 Hz), 4.54 (m, 1H), 4.44 (dd, 1H, *J* = 13.1, 6.7 Hz), 4.42 (dd, 1H, *J* = 13.1, 4.0 Hz), 3.97 (s, 3H), 3.35 (d, 1H, *J* = 1.2 Hz), 1.94 (s, 3H), 1.11 (s, 9H); HRMS (ESI), *m/z* calcd for C<sub>37</sub>H<sub>39</sub>NO<sub>6</sub>SiNa: 644.2445; found: 644.2418.

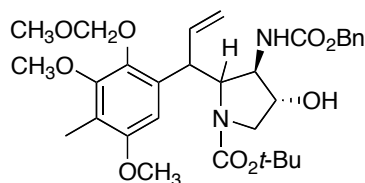

**3-Benzylloxycarbonylamino-2-[1-(3,5-dimethoxy-2-methoxymethoxy-4-methylphenyl)allyl]-4-hydroxy-pyrrolidine-1-carboxylic Acid *tert*-Butyl Ester (**46**)**. Boron trifluoride etherate (0.42 mL, 3.00 mmol) was slowly added to a solution of **37** (898.6 mg, 2.55 mmol) and **34** (1.79 g, 3.32 mmol) in CH<sub>2</sub>Cl<sub>2</sub> (12 mL) at -78 °C. The reaction mixture was stirred for 30 min at -78 °C and aqueous K<sub>2</sub>HPO<sub>4</sub>/KH<sub>2</sub>PO<sub>4</sub> buffer (1.0 M, pH 7, 15 mL) was added. The aqueous layer was extracted with EtOAc (3  $\times$ ) and the combined organic extracts were dried (Na<sub>2</sub>SO<sub>4</sub>), filtered, and the filtrate was evaporated in *vacuo*. The residue was purified by flash chromatography (silica, 25% EtOAc/hexane) to afford pure **46** (838.0 mg, 56%) as a pale yellow oil: <sup>1</sup>H NMR (CDCl<sub>3</sub>, 500 MHz)  $\delta$  7.30 (m, 5H), 6.54-6.50 (br, 1H), 6.17 (m, 1H), 5.24 (m, 2H), 5.29-4.96 (br, 6 H), 4.69-3.16 (br, 15 H), 2.10-2.03 (br, 3H), 1.44 (br, 9H); <sup>13</sup>C NMR (CDCl<sub>3</sub>, 125 MHz)  $\delta$  153.3, 151.8, 151.6, 141.7, 135.9, 135.8, 128.53, 128.5, 128.2, 128.0, 127.8, 119.8, 119.4, 105.7, 99.6, 99.6, 80.3, 79.8, 71.8, 67.3, 67.1, 66.9, 65.9, 60.4, 60.2, 57.6, 55.7, 52.7, 52.1, 51.7, 28.3, 8.9, 8.7 (mixture of diastereomers; some peaks belong to rotamers); HRMS (ESI), *m/z* calcd for C<sub>31</sub>H<sub>42</sub>N<sub>2</sub>O<sub>9</sub>Na: 609.2783; found: 609.2766.



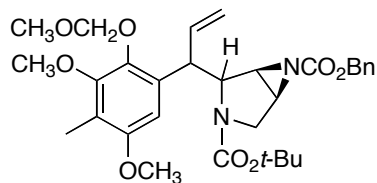

**2-[1-(3,5-Dimethoxy-2-methoxymethoxy-4-methylphenyl)allyl]-3,6-diazabicyclo[3.1.0]hexane-3,6-dicarboxylic Acid 6-Benzyl Ester 3-*tert*-Butyl Ester (47).** Diisopropyl azodicarboxylate (0.039 mL, 0.20 mmol) was slowly added to a solution of **46** (118.2 mg, 0.20 mmol) and PPh<sub>3</sub> (104.8 mg, 0.40 mmol) in THF (10 mL) at 25 °C. The reaction mixture was stirred for 1 h at 25 °C and aqueous K<sub>2</sub>HPO<sub>4</sub>/KH<sub>2</sub>PO<sub>4</sub> buffer (1.0 M, pH 7, 5 mL) was added. The aqueous layer was extracted with EtOAc (3 ×) and the combined organic extracts were dried (Na<sub>2</sub>SO<sub>4</sub>), filtered, and the filtrate was evaporated in *vacuo*. The residue was purified by flash chromatography (silica, 10% EtOAc/hexane) to afford pure **47** (89.7 mg, 79%) as a pale yellow oil: <sup>1</sup>H NMR (CDCl<sub>3</sub>, 500 MHz) δ 7.33 (m, 5H), 6.57-6.46 (br, 1H), 6.23 (br, 1H), 5.28-4.94 (br, 8 H), 4.42-3.31 (br, 13 H), 3.15-2.63 (br, 2H), 2.08-2.00 (br, 3H), 1.47 (br, 9H); <sup>13</sup>C NMR (CDCl<sub>3</sub>, 125 MHz) δ 158.7, 152.3, 152.0, 141.9, 136.2, 136.0, 129.6, 129.2, 128.5, 128.0, 127.7, 119.4, 119.0, 106.4, 98.7, 98.6, 80.9, 80.7, 67.0, 66.9, 66.5, 66.4, 65.9, 61.4, 61.3, 58.3, 54.6, 52.0, 51.9, 51.7, 45.0, 44.6, 39.4, 39.4, 38.8, 28.8, 8.7, 8.5 (mixture of diastereomers; some peaks belong to rotamers); HRMS (ESI), *m/z* calcd for C<sub>31</sub>H<sub>40</sub>N<sub>2</sub>O<sub>8</sub>Na: 591.2683; found: 591.2697.

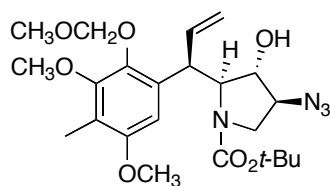

**Azidoalcohol 49.** Borontrifluoride etherate (0.58 mL, 4.58 mmol) was added to a solution of azide **22** (1.00 g, 3.52 mmol) and stannane **34** (2.48 g, 4.58 mmol) in CH<sub>2</sub>Cl<sub>2</sub> (15 mL) at -40 °C and the reaction mixture was stirred for 2 h at this temperature. The reaction was quenched by the addition of saturated aqueous Na<sub>2</sub>CO<sub>3</sub> and was extracted three times with CH<sub>2</sub>Cl<sub>2</sub>. The combined organic extracts were dried (MgSO<sub>4</sub>) and evaporated in *vacuo*. The residue was purified by a short-column flash chromatography (silica, 35% EtOAc/hexane) to give azidoalcohol **49** (1.26 g, 73%) as a colorless oil, and the recovered azide **22** (120 mg, 12%). Crude NMR showed two diastereoisomers in a 7:3 ratio, inseparable by flash chromatography. The mixture was characterized: <sup>1</sup>H NMR (CDCl<sub>3</sub>, 500 MHz, 60 °C) δ 5.88-5.70 (br, 1H), 4.50

(br t, 1H), 4.02 (br, 1H), 3.87-3.73 (br, 1H), 3.07 (br t, 1H), 2.45-2.37 (br, 1H), 1.46 (s, 3H), 1.43 (s, 9H), 1.33 (s, 3H); IR (KBr)  $\nu_{\max}$  3408, 3078, 2937, 2104, 1674, 1605, 1584  $\text{cm}^{-1}$ ; HRMS (ESI),  $m/z$  calcd for  $\text{C}_{23}\text{H}_{34}\text{N}_4\text{O}_7\text{Na}$ : 501.1825; found: 501.2268.

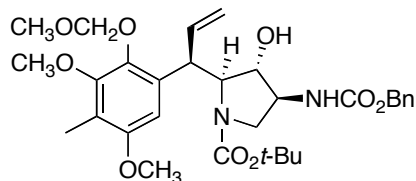

**Carbamate Alcohol 50.** A solution of azidoalcohol **49** (1.41 g,

2.94 mmol) in  $\text{CH}_3\text{CN}$  (20 mL) was added to a solution of  $\text{SnCl}_2$  (937 mg, 4.71 mmol), thiophenol (1.45 mL, 14.2 mmol) and  $\text{Et}_3\text{N}$  (1.97 mL, 14.2 mmol) in  $\text{CH}_3\text{CN}$  (20 mL) at 0 °C. The reaction mixture was stirred for 1 h and additional thiophenol (0.30 mL, 2.94 mmol) was added. After an additional 1 h, the mixture was diluted with  $\text{CH}_2\text{Cl}_2$  (100 mL) and washed with 2N NaOH solution (2 x). The aqueous phase was extracted with  $\text{CH}_2\text{Cl}_2$  (3 x). The combined organic extracts were dried ( $\text{MgSO}_4$ ) and evaporated under reduced pressure. The residual yellow oil was diluted with  $\text{CH}_2\text{Cl}_2$  (50 mL) and was treated with  $\text{Et}_3\text{N}$  (0.82 mL, 5.90 mmol) and benzyl chloroformate (0.42 mL, 2.94 mmol) at 0 °C. The reaction mixture was stirred 3 h at room temperature and was quenched by the addition of saturated aqueous  $\text{NaHCO}_3$ . The aqueous phase was extracted with  $\text{CH}_2\text{Cl}_2$  (3 x) and the organic phase was dried ( $\text{MgSO}_4$ ) and concentrated under reduced pressure. The residue was purified by flash chromatography (silica, 30%  $\text{Et}_2\text{O}$ /toluene) to give the major diastereoisomer **50** (933 mg, 54%) and the minor diastereoisomer **50** (363 mg, 21%): IR (KBr)  $\nu_{\max}$  3356, 2929, 1694, 1607, 1589  $\text{cm}^{-1}$ .

The major isomer of **50** was characterized:  $^1\text{H}$  NMR ( $\text{CDCl}_3$ , 500 MHz, 60 °C)  $\delta$  7.28-7.37 (m, 5H), 6.56 (s, 1H), 6.11-6.19 (m, 1H), 5.74 (br s, 1H), 4.99-5.13 (m, 6H), 4.18-4.26 (m, 2H), 3.99-4.02 (m, 1H), 3.93 (app t, 1H,  $J = 9.1$  Hz), 3.80 (s, 1H), 3.75 (s, 3H), 3.72 (s, 3H), 3.44 (s, 3H), 3.06-3.10 (m, 1H), 2.51 (s, 1H), 2.11 (s, 3H), 1.48 (s, 9H);  $^{13}\text{C}$  NMR ( $\text{CDCl}_3$ , 125 MHz, 60 °C)  $\delta$  156.4, 155.4, 155.0, 152.1, 141.8, 138.9, 136.7, 132.1, 128.6, 128.3, 128.2, 120.2, 116.2, 105.5, 100.1, 80.0, 79.5, 69.3, 67.1, 60.3, 58.5, 57.8, 56.0, 51.8, 45.6, 28.6, 8.9; HRMS (ESI),  $m/z$  calcd for  $\text{C}_{31}\text{H}_{42}\text{N}_2\text{O}_9\text{Na}$ : 609.2783; found: 609.2749.

The minor isomer of **50** was characterized:  $^1\text{H}$  NMR ( $\text{CDCl}_3$ , 400 MHz)  $\delta$  7.30-7.36 (m, 5H), 6.55 (s, 1H), 6.10-6.19 (m, 1H), 5.63 (br s, 1H), 4.95-5.22 (m, 6H), 3.98-4.23 (m, 5H), 3.78-3.81

(m, 1H), 3.78 (s, 3H), 3.72 (s, 3H), (m, 1H), 3.05 (br s, 1H), 2.08 (s, 3H), 1.26 (s, 9H); HRMS (ESI),  $m/z$  calcd for  $C_{31}H_{42}N_2O_9Na$ : 609.2783; found: 609.2769.

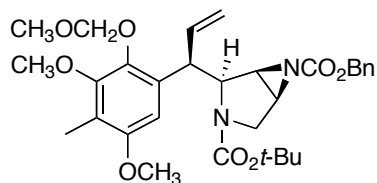

**Aziridine 51.** Diisopropyl azodicarboxylate (0.29 mL, 1.45 mmol) was added to a solution of compound **50** (426 mg, 0.727 mmol) and  $Ph_3P$  (381 mg, 1.45 mmol) in THF (15 mL) at 0 °C. The mixture was stirred for 2 h at room temperature and the volatiles were removed under reduced pressure. The residue was taken up in ether and the white precipitate in filtered. The filtrate was concentrated in *vacuo*, and the residue was purified by flash chromatography (silica, 30% EtOAc/hexane) to give aziridine **51** (336 mg, 81%):  $^1H$  NMR ( $CDCl_3$ , 400 MHz)  $\delta$  7.27-7.40 (m, 5H), 6.73 (s, 1H), 6.19-6.28 (m, 1H), 5.16 (d, 1H,  $J = 12.3$  Hz), 4.96-5.05 (m, 5H), 4.63 (app d, 1H,  $J = 9.5$  Hz), 4.21 (m, 1H), 3.82 (s, 3H), 3.77-3.82 (m, 1H), 3.77 (s, 3H), 3.61-3.65 (m, 1H), 3.61 (s, 3H), 3.31 (s, 2H), 2.17 (s, 3H), 1.52 (s, 9H);  $^{13}C$  NMR ( $CDCl_3$ , 100 MHz, 60 °C)  $\delta$  161.9, 155.2, 154.2, 151.9, 142.0, 140.3, 135.7, 131.9, 128.4, 128.2, 127.9, 119.0, 114.6, 105.7, 99.0, 79.9, 67.9, 61.4, 60.0, 57.3, 55.6, 50.1, 46.9, 44.3, 28.2, 8.8; IR (KBr)  $\nu_{max}$  2934, 1728, 1698  $cm^{-1}$ ; HRMS (ESI),  $m/z$  calcd for  $C_{31}H_{40}N_2O_8Na$ : 591.2677; found: 591.2718.

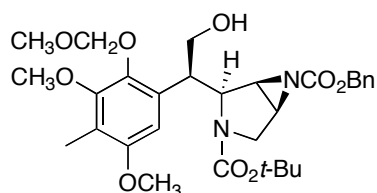

**Aziridinoalcohol 52.** A stream of  $O_3$  in  $O_2$  was slowly bubbled into a solution of **51** (390 mg, 0.687 mmol) in MeOH (60 mL) and  $CH_2Cl_2$  (18 mL) at -78 °C. The progress of the reaction was carefully monitored by TLC and  $N_2$  was bubbled into the reaction mixture for 30 min immediately after the reaction was judged complete. The reaction mixture was warmed to 0 °C and  $NaBH_4$  (261 mg, 6.87 mmol) was added. The reaction mixture was stirred for 4 h at 0 °C and was quenched with water. The aqueous phase was extracted with  $CH_2Cl_2$  (3  $\times$ ), dried ( $MgSO_4$ ), and concentrated under reduced pressure. The residue was purified by flash chromatography (silica, 30% EtOAc/hexane) to afford **52** (247 mg, 63%) as a colorless

oil:  $^1\text{H}$  NMR ( $\text{CDCl}_3$ , 400 MHz)  $\delta$  7.29-7.34 (m, 3H), 7.12 (s, 2H), 6.78 (s, 1H), 5.08 (d, 1H,  $J = 12.4$  Hz), 4.96-4.99 (m, 2H), 4.85 (d, 1H,  $J = 12.4$  Hz), 4.65-4.68 (m, 1H), 4.27 (s br, 1H), 3.85 (s, 3H), 3.80-3.86 (m, 1H), 3.71 (s, 3H), 3.65-3.71 (m, 1H), 3.60 (d, 1H,  $J = 12.6$  Hz), 3.55 (s, 3H), 3.28-3.31 (m, 2H), 2.13 (s, 3H), 1.51 (s, 9H);  $^{13}\text{C}$  NMR ( $\text{CDCl}_3$ , 125 MHz, 60 °C)  $\delta$  161.9, 157.1, 154.3, 151.7, 142.2, 135.7, 131.8, 128.5, 128.2, 127.8, 119.2, 105.9, 99.2, 81.2, 68.0, 63.9, 60.1, 58.5, 57.2, 55.8, 50.5, 47.4, 44.1, 42.5, 28.4, 9.0; IR (KBr)  $\nu_{\text{max}}$  3446, 3064, 2937, 1729, 1677  $\text{cm}^{-1}$ ; HRMS (ESI),  $m/z$  calcd for  $\text{C}_{30}\text{H}_{40}\text{N}_2\text{O}_9\text{Na}$ : 595.2632; found: 595.2628.

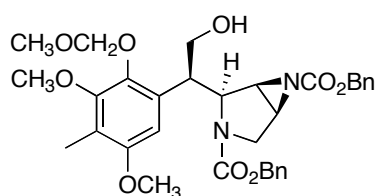

**Bis-benzylcarbamate 53.** Trimethylsilyl

trifluoromethanesulfonate (84  $\mu\text{L}$ , 0.47 mmol) was added to a solution of 2,6-di-*tert*-butylpyridine (122  $\mu\text{L}$ , 0.544 mmol) and carbamate **52** (89.0 mg, 0.156 mmol) in  $\text{CH}_2\text{Cl}_2$  (3.5 mL) at 0 °C. The reaction mixture was stirred at 0 °C for 2 h when a buffered solution of pyridinium fluoride (1 mL HF/3 mL pyridine, 1.55 mmol) was added and the mixture was stirred for 15 min at 0 °C. The mixture was washed with aqueous 3 N NaOH and the aqueous phase was extracted  $\text{CH}_2\text{Cl}_2$  (3  $\times$ ). The combined organic extracts were dried ( $\text{MgSO}_4$ ), and the solvent was removed *in vacuo*. The residue was dissolved in  $\text{CH}_2\text{Cl}_2$  (4 mL) at 0 °C and treated sequentially with  $\text{Et}_3\text{N}$  (32.0  $\mu\text{L}$ , 0.233 mmol) and benzyl chloroformate (24.0  $\mu\text{L}$ , 0.171 mmol). The reaction mixture was allowed to warm to room temperature, and was stirred 3 h at this temperature. The reaction was quenched by the addition of saturated aqueous  $\text{NaHCO}_3$ , and the aqueous phase was extracted with  $\text{CH}_2\text{Cl}_2$  (3  $\times$ ). The combined organic extracts were dried ( $\text{MgSO}_4$ ), and the solvent was removed *in vacuo*. The residue was purified by flash chromatography (silica, 40% EtOAc/hexane) to afford pure **53** (56.5 mg, 60%):  $^1\text{H}$  NMR ( $\text{CDCl}_3$ , 500 MHz, 60 °C)  $\delta$  7.27-7.39 (m, 8H), 7.06 (s br, 2H), 6.37 (s, 1H), 5.47 (s br, 1H), 5.14-5.20 (m, 2H), 4.91 (d, 2H,  $J = 12.2$  Hz), 4.72 (s br, 1H), 4.69-4.70 (m, 2H), 4.38 (s br, 1H), 4.23 (s br, 2H), 4.15 (t, 1H,  $J = 8.2$  Hz), 3.81-3.84 (m, 2H), 3.73 (s br, 6H), 3.54 (s br, 3H), 3.04 (t, 1H,  $J = 10.4$  Hz), 2.15 (s, 3H);  $^{13}\text{C}$  NMR ( $\text{CDCl}_3$ , 125 MHz, 60 °C)  $\delta$  156.1, 154.7, 152.0, 143.4, 136.7, 136.5, 128.7, 128.5, 128.3, 128.3, 128.1, 128.1, 127.3, 120.2, 105.4, 100.0, 83.1, 82.4, 74.0, 67.2, 64.7, 60.2, 57.4,

56.1, 53.7, 51.7, 43.9, 9.0; IR (KBr)  $\nu_{\max}$  3430, 3334, 2941, 1710  $\text{cm}^{-1}$ ; HRMS (ESI),  $m/z$  calcd for  $\text{C}_{33}\text{H}_{38}\text{N}_2\text{O}_9\text{Na}$ : 629.2470; found: 629.2477.

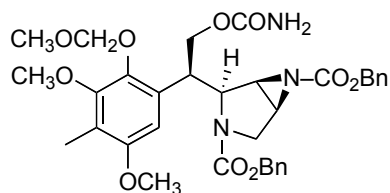

**Carbamate 54.** A solution of alcohol **53** (70.1 mg, 0.116 mmol) in  $\text{CH}_2\text{Cl}_2$  (1 mL) was added trichloroacetyl isocyanate (83  $\mu\text{L}$ , 0.693 mmol). The resulting mixture was stirred for 12 h at 65  $^\circ\text{C}$  in a sealed tube. After cooling to room temperature, another portion of trichloroacetyl isocyanate (83  $\mu\text{L}$ , 0.693 mmol) was added and the solution was stirred for 24 h at 65  $^\circ\text{C}$ . Then, the mixture was carefully deposited on a short column of neutral alumina that was pre-wetted with  $\text{CH}_2\text{Cl}_2$ . After 30 min on standing, the mixture was mixture was eluted with EtOAc. The crude was purified by flash chromatography (silica, 60% EtOAc/hexane) to afford pure **54** (64.5 mg, 86%) as a colorless oil:  $^1\text{H}$  NMR ( $\text{CDCl}_3$ , 500 MHz, 50  $^\circ\text{C}$ )  $\delta$  7.33-7.41 (m, 5H), 7.22 (s br, 3H), 6.95 (s br, 2H), 6.19 (s, 1H), 5.31 (d, 1H,  $J = 11.9$  Hz), 5.22 (s, 1H), 5.21 (d, 1H,  $J = 11.9$  Hz), 4.81 (m, 4H), 4.61 (s br, 1H), 4.10-4.20 (m, 4H), 3.93 (m, 1H), 3.46-3.79 (m, 10H), 2.11 (s, 3H).  $^{13}\text{C}$  NMR ( $\text{CDCl}_3$ , 125 MHz, 50  $^\circ\text{C}$ )  $\delta$  156.3, 155.5, 154.6, 154.4, 151.7, 142.9, 136.2, 134.7, 129.0, 128.9, 128.3, 128.0, 127.9, 127.0, 119.8, 105.5, 99.6, 83.0, 73.7, 69.3, 67.0, 63.7, 60.1, 57.5, 57.2, 56.1, 53.4, 48.1, 43.3, 8.9. IR (KBr)  $\nu_{\max}$  3430, 3337, 2954, 1720, 1698  $\text{cm}^{-1}$ ; HRMS (ESI),  $m/e$  calcd for  $\text{C}_{34}\text{H}_{39}\text{N}_3\text{O}_{10}\text{Na}$ : 672.2528; found: 672.2520.

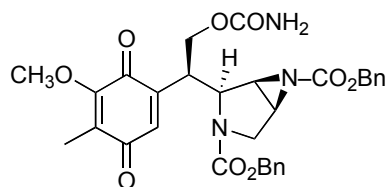

**Quinone 55.** A solution of ceric ammonium nitrate (128 mg, 0.234 mmol) in  $\text{H}_2\text{O}$  (0.6 mL) was added to a room temperature solution of compound **54** (38 mg, 0.059 mmol) in  $\text{CH}_3\text{CN}$  (2.5 mL). The mixture was stirred 10 min at this temperature and was diluted with  $\text{CH}_2\text{Cl}_2$  and washed with water. The aqueous phase was extracted with  $\text{CH}_2\text{Cl}_2$  (3  $\times$ ), and the organic phase was dried ( $\text{MgSO}_4$ ), and concentrated under reduced pressure. The residue was purified by flash chromatography (60% EtOAc/hexane) to give **55** (32.7 mg, 95%):  $^1\text{H}$  NMR ( $\text{CDCl}_3$ , 500 MHz)  $\delta$  7.41-7.45 (m, 5H), 7.26-7.30 (m, 3H), 7.14 (br s, 2H), 5.76 (s,

1H), 5.24 (m, 2H), 4.99 (d, 1H,  $J = 12.4$  Hz), 4.86-4.89 (m, 1H), 4.82 (d, 1H,  $J = 12.4$  Hz), 4.75 (t, 1H,  $J = 5.2$  Hz), 4.56 (t, 1H,  $J = 5.4$  Hz), 4.05 (s, 3H), 3.91-4.00 (m, 2H), 3.65-3.67 (m, 2H), 3.38 (m, 1H), 1.83 (s, 3H);  $^{13}\text{C}$  NMR ( $\text{CDCl}_3$ , 125 MHz)  $\delta$  187.7, 181.6, 157.6, 156.1, 155.3, 154.9, 142.4, 136.5, 134.3, 130.3, 129.6, 129.2, 129.1, 128.7, 128.2, 127.5, 126.9, 82.1, 69.7, 69.2, 67.1, 63.5, 60.6, 56.5, 47.7, 43.6, 8.4; IR (KBr)  $\nu_{\text{max}}$  3437, 3331, 2921, 1726, 1695, 1654, 1610  $\text{cm}^{-1}$ ; HRMS (ESI),  $m/z$  calcd for  $\text{C}_{31}\text{H}_{31}\text{N}_3\text{O}_9\text{Na}$ : 612.1953; found: 612.1950.

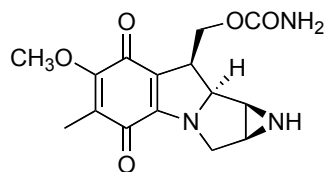

**9a-Desmethoxy Mitomycin A (1).** A solution of carbamate **55** (15 mg, 0.027 mmol) in MeOH (2 mL) was stirred with Pd/C (catalytic) under an atmosphere of  $\text{H}_2$  (balloon) at room temperature for 3 h. Following filtration of the catalyst first through Celite then through a 45 micron filter, the solution was vigorously stirred open to the air for 4 h. The volatiles were removed under reduced pressure and the residue was purified by preparative TLC (10% MeOH/ $\text{CH}_2\text{Cl}_2$ ) to afford the title compound **1** as a purple oil (6.0 mg, 74%):  $^1\text{H}$  NMR ( $\text{CDCl}_3$ , 500 MHz)  $\delta$  5.13 (m, 1H), 4.62 (dd, 1H,  $J = 4.5, 8.9$  Hz), 4.53-4.58 (m, 1H), 4.35 (app t, 1H,  $J = 5.0$  Hz), 4.28 (br s, 2H), 4.05 (app d, 1H,  $J = 9.2$  Hz), 4.00 (s, 3H), 3.82 (dd, 1H,  $J = 6.0, 9.3$  Hz), 3.70-3.74 (m, 2H), 3.50 (dd, 1H,  $J = 5.5, 12.3$  Hz);  $^{13}\text{C}$  NMR ( $\text{CDCl}_3$ , 125 MHz)  $\delta$  182.3, 178.5, 157.2, 156.8, 153.9, 124.6, 120.7, 82.9, 74.6, 74.1, 60.7, 56.4, 45.1, 31.5, 29.3, 28.9, 22.3, 13.4, 7.5; IR (KBr)  $\nu_{\text{max}}$  3450, 3354, 3205, 2915, 1647, 1609  $\text{cm}^{-1}$ ; HRMS (ESI),  $m/z$  calcd for  $\text{C}_{15}\text{H}_{17}\text{N}_3\text{O}_9\text{Na}$ : 342.1060; found: 342.1057.

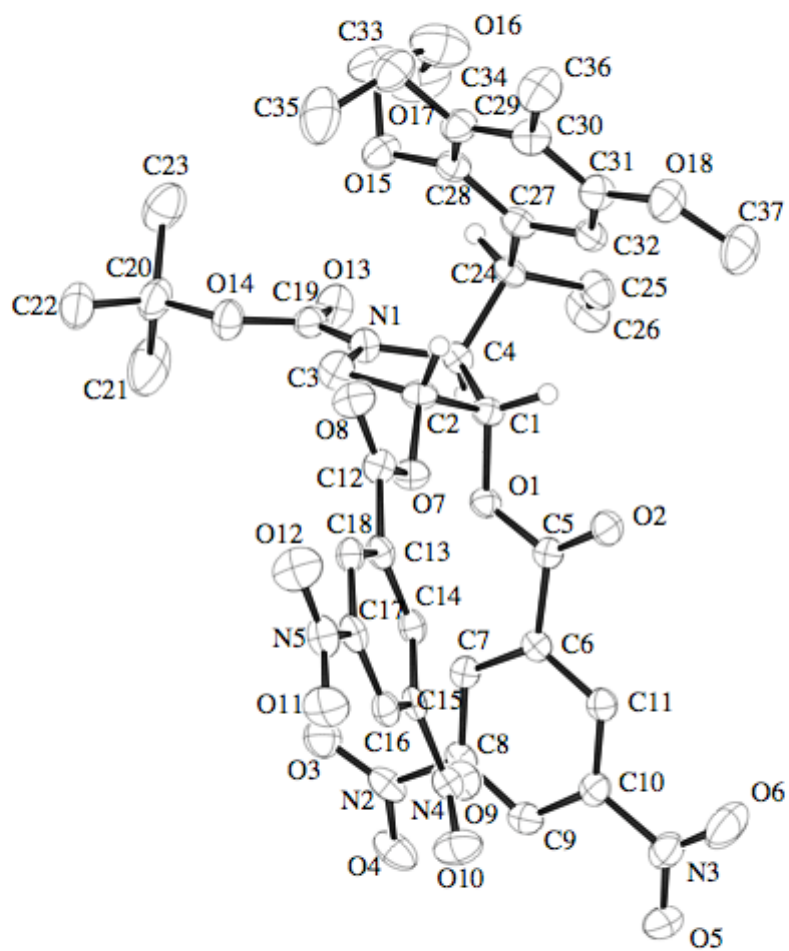

---

ORTEP Structure of **37**
